# Supplementary material for: The Vitamin D Receptor–BIM Axis Overcomes Cisplatin Resistance in Head and Neck Cancer
Source: MDPI journal article supplement (doi:10.3390/cancers14205131), 2022-10-19
Supplement: s1 [file s1]

*Supplementary Information*

# **The Vitamin D receptor-BIM axis overcomes cisplatin resistance in head and neck cancer**

**Aya Khamis<sup>1,2,\*</sup>, Désirée Gül<sup>1,\*</sup>, Madita Wandrey<sup>1</sup>, Qiang Lu<sup>1</sup>, Shirley K. Knauer<sup>3</sup>, Christoph Reinhardt<sup>4</sup>, Sebastian Strieth<sup>5</sup>, Jan Hagemann<sup>1</sup>, and Roland H. Stauber<sup>1,#</sup>**

<sup>1</sup> Department of Otorhinolaryngology Head and Neck Surgery; Molecular and Cellular Oncology; University Medical Center, Mainz, Germany

<sup>2</sup> Oral Pathology Department, Faculty of Dentistry, Alexandria University, Alexandria, Egypt

<sup>3</sup> Institute for Molecular Biology, Centre for Medical Biotechnology (ZMB/CENIDE), University Duisburg-Essen, Universitätsstraße, 45117 Essen, Germany

<sup>4</sup> Center for Thrombosis and Hemostasis (CTH), University Medical Center Mainz, Langenbeckstrasse 1, 55131 Mainz, Germany

<sup>5</sup> Department of Otorhinolaryngology, University Medical Center Bonn, Bonn, Germany

\* Equal first author contribution, #Correspondence: [rstauber@uni-mainz.de](mailto:rstauber@uni-mainz.de); [ayakhamis@uni-mainz.de](mailto:ayakhamis@uni-mainz.de). Phone: +49-6131176030.

## Supplementary Tables

**Table S1. Antibodies used for Western Blot and immunofluorescence analyses.**

| Antigen                      | Host   | Manufacturer and Article Number | Dilution (x-fold) |
|------------------------------|--------|---------------------------------|-------------------|
| <b>Western Blot Analysis</b> |        |                                 |                   |
| Actin                        | rabbit | Sigma Aldrich, A2066            | 5000              |
| E-Cadherin                   | mouse  | BD Bioscience, 610182           | 5000              |
| VDR                          | mouse  | Santa Cruz; sc-13133            | 1000              |
| GAPDH                        | mouse  | Santa Cruz, sc-47724            | 3000              |
| VDR                          | rabbit | Abcam, ab3508                   | 5000              |
| BIM                          | rabbit | Sigma, B7929                    | 1000              |
| *0009                        | rabbit | Bethyl Laboratories, A300-081A  | 1000              |
| Rabbit (HRP coupled)         | goat   | Cell Signaling; 7074            | 5000              |
| Mouse (HRP coupled)          | mouse  | Cell Signaling; 7076            | 5000              |
| <b>Immunofluorescence</b>    |        |                                 |                   |
| VDR                          | rabbit | Abcam ab3508                    | 200               |
| Rabbit (FITC coupled)        | goat   | Dianova; 111-165-003            | 300               |

**Table S2. Primer Sequences**

| Name           | Sequence (5' → 3')                        |
|----------------|-------------------------------------------|
| VDR_fw         | TACCGAGCTCGGATCCCCTGGGCTCCACTTACCTG       |
| VDR_rev        | CCTCGCCCTTGCTAGCGGAGATCTCATTGCCAAAC<br>AC |
| ColPCR_pC3_fw  | CCCACTGCTTACTGGCTTAT                      |
| ColPCR_pC3_rev | AGCAGTACGATCTGGTCCT                       |

## Supplementary Figures

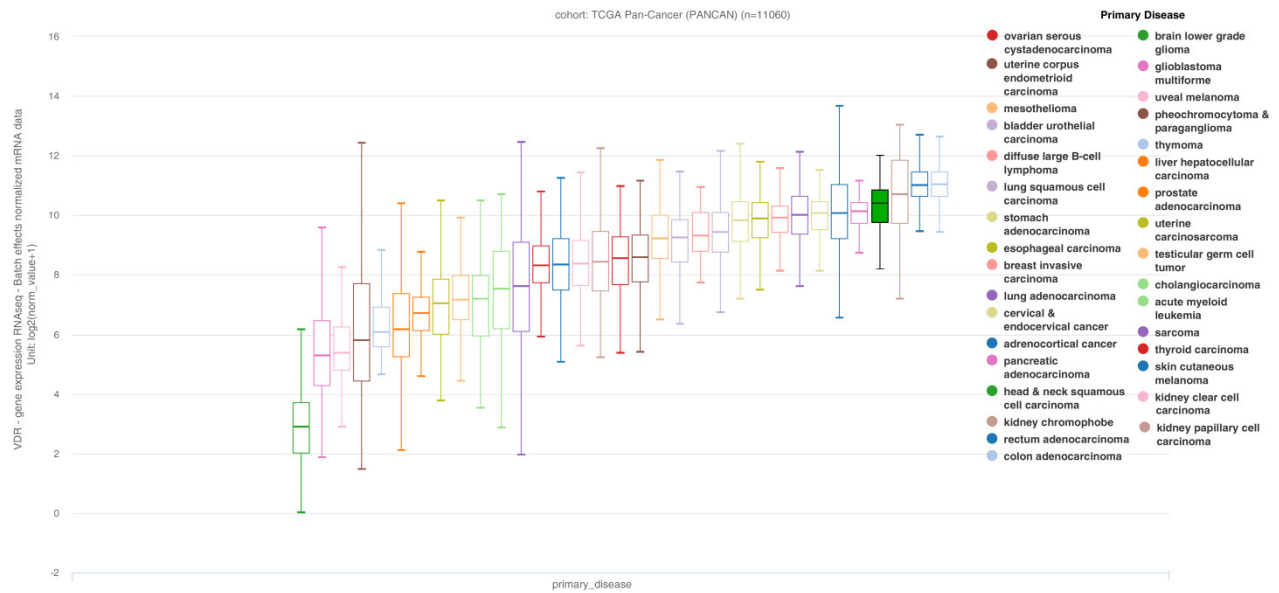

**Figure S1. VDR mRNA expression in different tumor types according to the PANCAN data set obtained from *The Cancer Genome Atlas* (TCGA).** VDR is highly expressed not only in colon adenocarcinomas, but also in HNSCC, supporting a pathobiological relevance of VDR for this tumor entity.

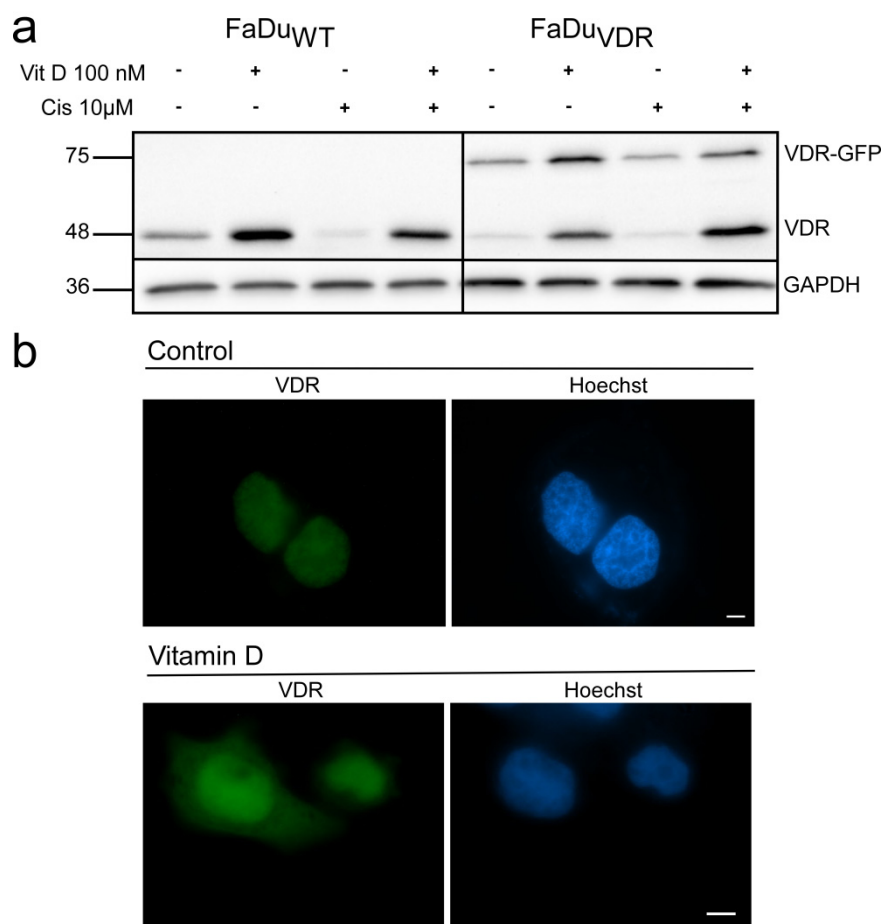

**Figure S2. Overexpression of VDR increases cisplatin resistance of FaDu cells.** (a) Immunoblot analysis demonstrated successful expression of VDR-GFP in FaDu cells. Furthermore, VDR expression is increased in response to VitD and combination treatment. GAPDH served as the loading control. (b) Fluorescence microscopy to visualize the influence of Vitamin D on VDR receptor expression and translocation in FaDu VDR cells. Nuclei were stained with Hoechst (blue). Scale bar, 5  $\mu$ m.

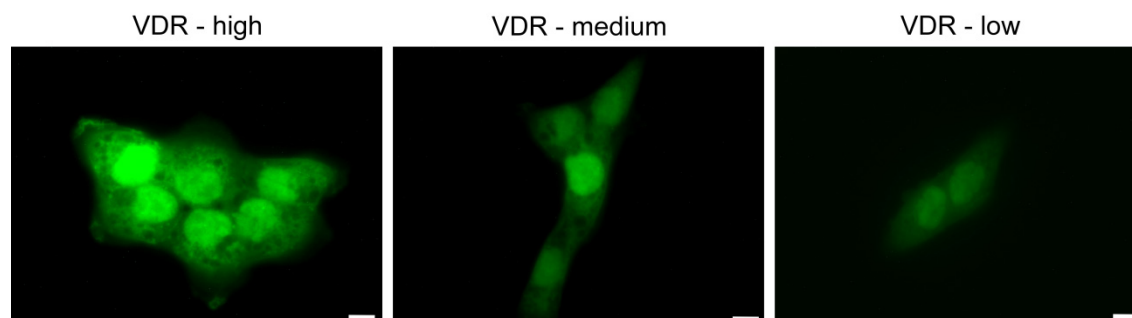

**Figure S3. Overexpression of VDR increases cisplatin resistance of HNSCCUM-02T cells.** Fluorescence microscopy to visualize the influence of Vitamin D on VDR receptor expression in HNSCCUM-02T- VDR cells. Nuclei were stained with Hoechst (blue). Scale bar, 5  $\mu$ m.

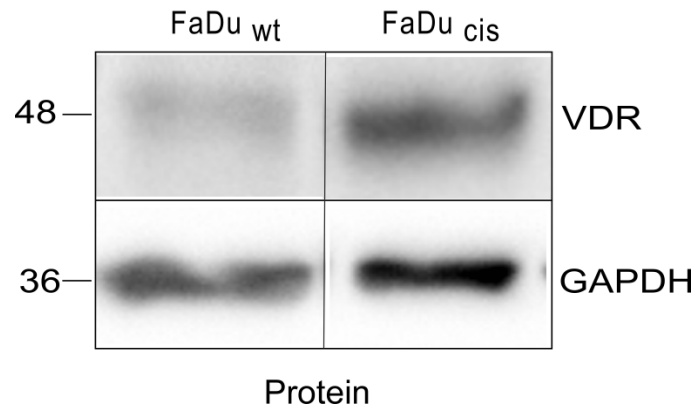

**Figure S4. VDR is upregulated in cisplatin-resistant HNSCC cell models.** Overexpression of VDR in resistant FaDu cis versus sensitive (FaDu wt) cells was demonstrated by Immunoblot analysis GAPDH served as the loading control.

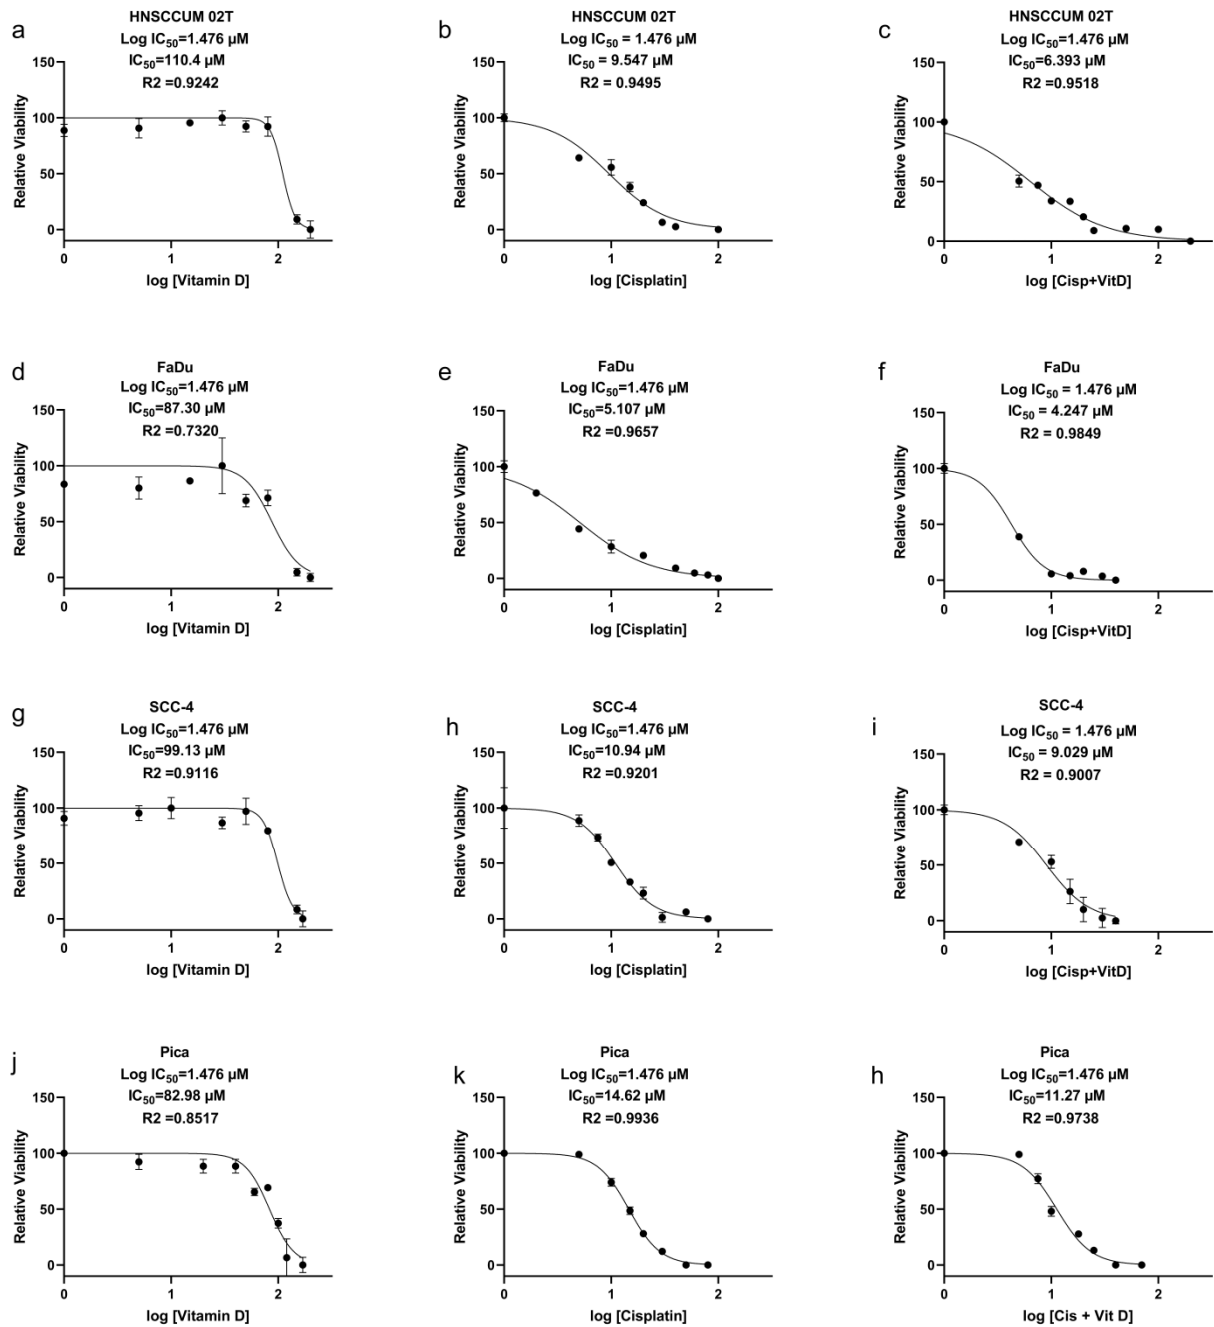

Figure S5. Dose-response curves and  $IC_{50}$  values for HNSCCUM-02T (a-c), FaDu (d-f), SCC-4 (g-i), and Pica cells (j-h).

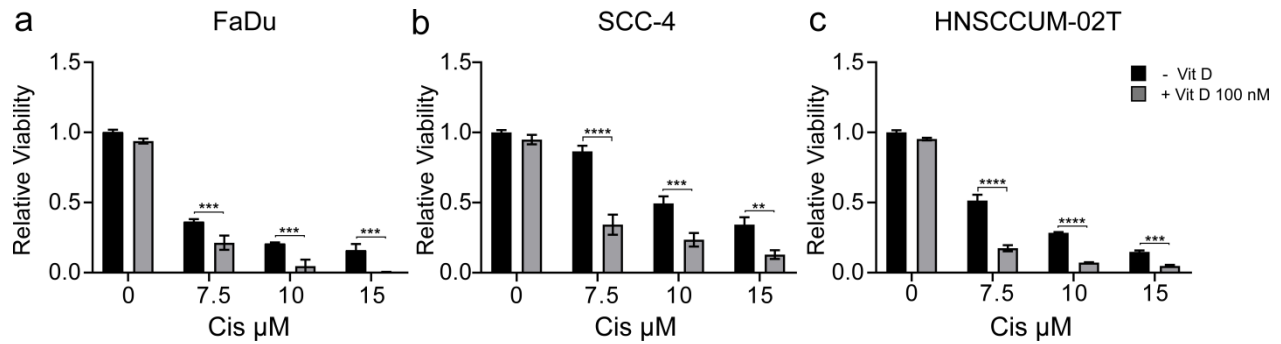

**Figure S6. VitD treatment increases cisplatin sensitivity of different HNSCC cell lines.** Combinational treatment of VitD/cisplatin synergistically triggered cell death of wild-type (a) FaDu (b) SCC-4 and (c) HNSCCUM-02T cells. Cells were seeded in the presence or absence of 100 nM VitD, after 24h the cells were treated with 7.5, 10, and 15  $\mu$ M cisplatin with and without VitD. The viability of the cells was measured and normalized to untreated controls.

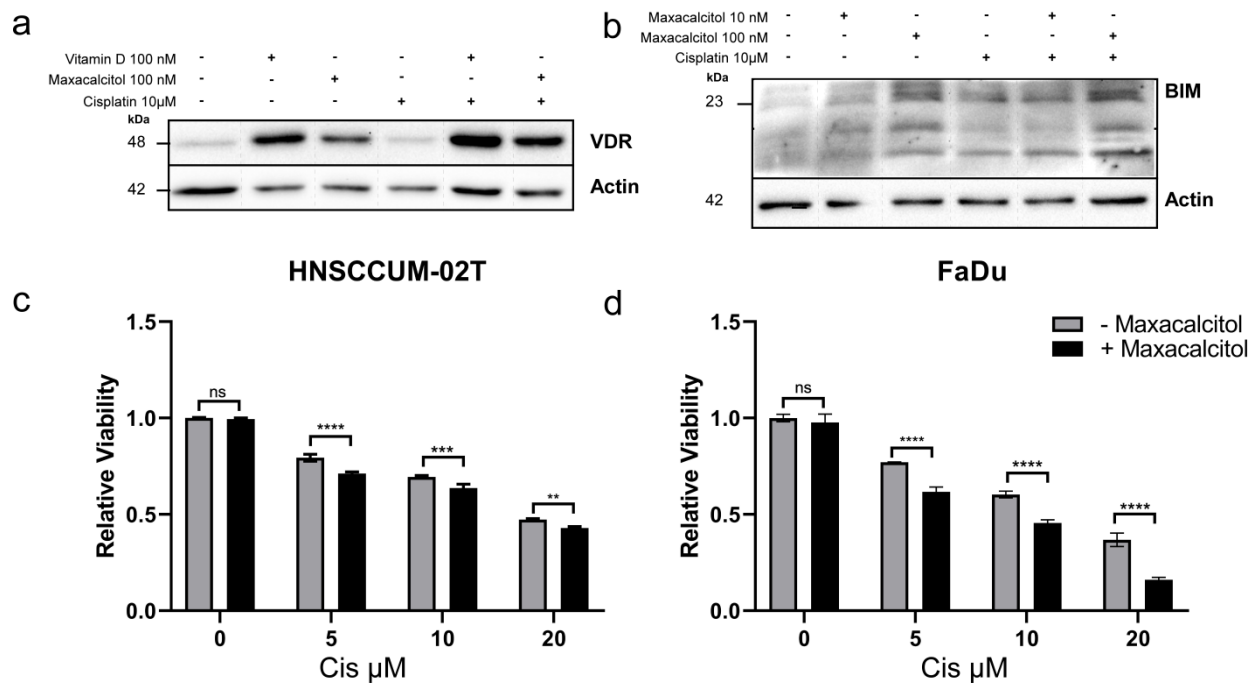

**Figure S7. The VitD analog Maxacalcitol executes similar function on HNSCC cells in overcoming cisplatin resistance** (a) Immunoblot analyses reveal significant increase of VDR in VitD and Maxacalcitol as well as in Cisplatin Combination co-treated HNSCCUM-02T cells. Actin served as the loading control. (a) Immunoblot analyses reveal significant increase of BIM in Maxacalcitol and Maxacalcitol/Cisplatin co-treated HNSCCUM-02T cells. Actin served as the loading control. (c&d) HNSCCUM-02T and FaDu cells were treated for 72 h (5, 10, and 20  $\mu$ M cisplatin in presence and absence of 100 nM Maxacalcitol). Cell viability was normalized to untreated controls.

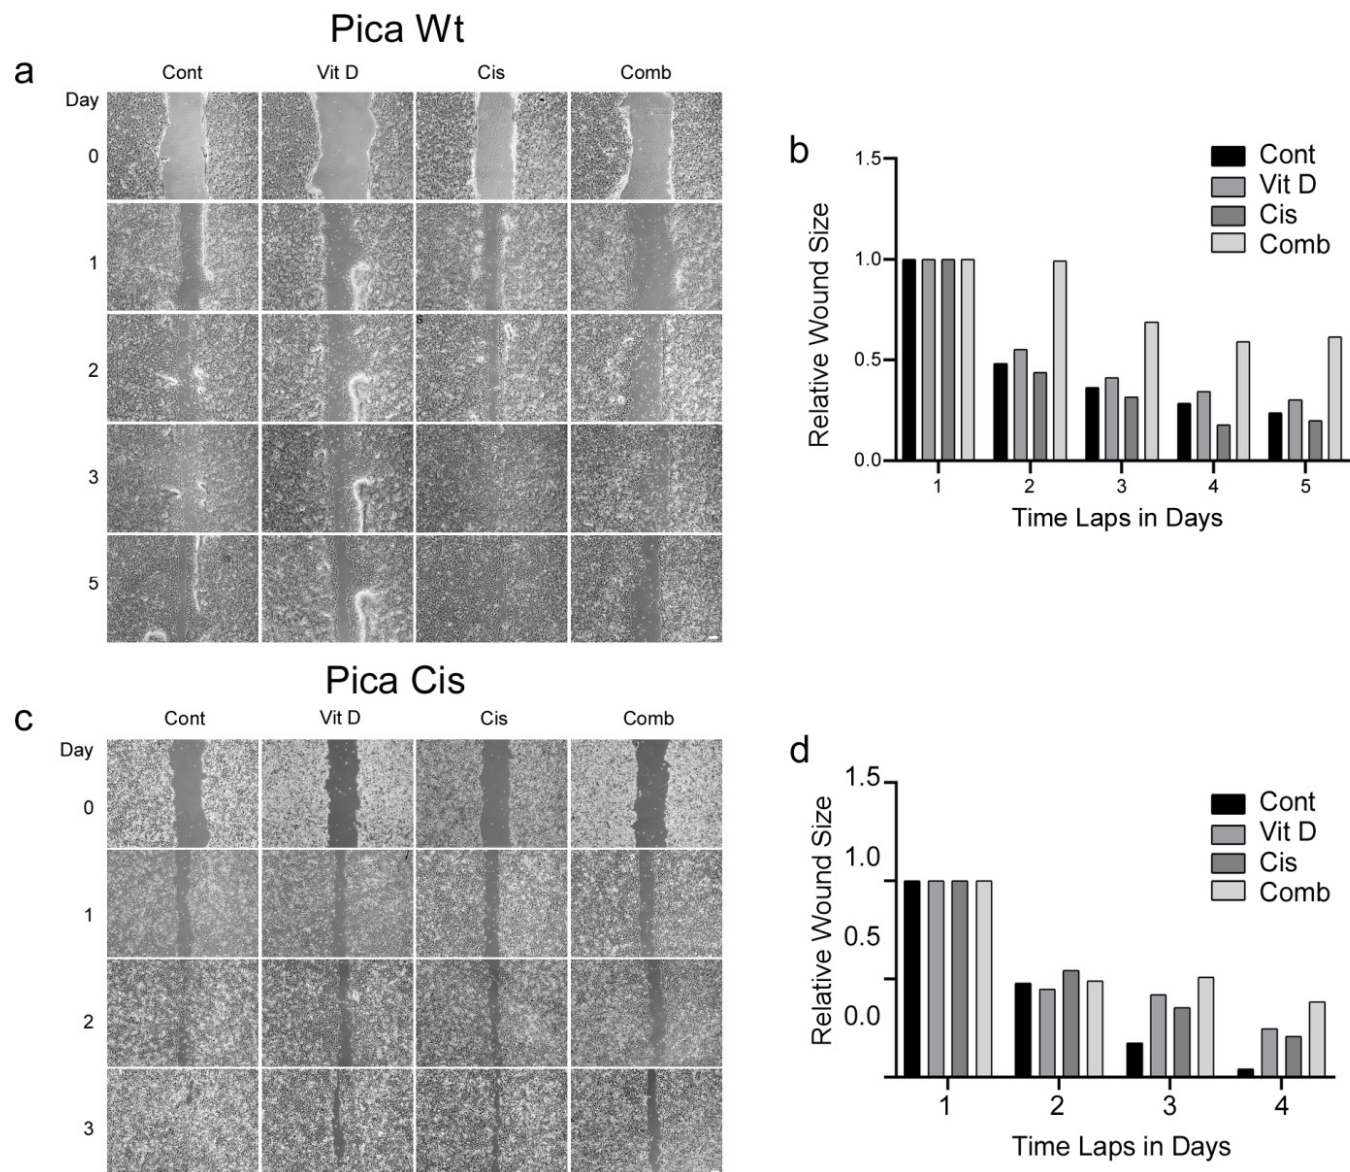

**Figure S8. VitD reduces the migration ability of HNSCC cells.** (a&c) Wound healing assays were performed to evaluate the migration of Pica Wt, and cisplatin-resistant cells. Cells were treated with VitD (100 nM), or cisplatin (10  $\mu$ M) alone, and with the combination. Scale bar, 100  $\mu$ M. (b/d) Relative wound size was measured every 24 hrs.

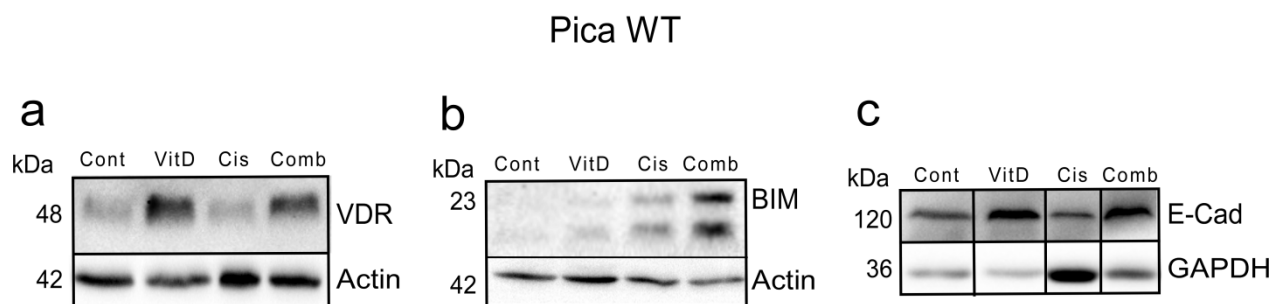

**Figure S9.** Immunoblot analysis of Pica cells shows upregulation of VDR (a), BIM (b), and E-cadherin (c) in response to VitD/cisplatin. Actin and GAPDH served as the loading control. Proteins were detected by specific Ab.

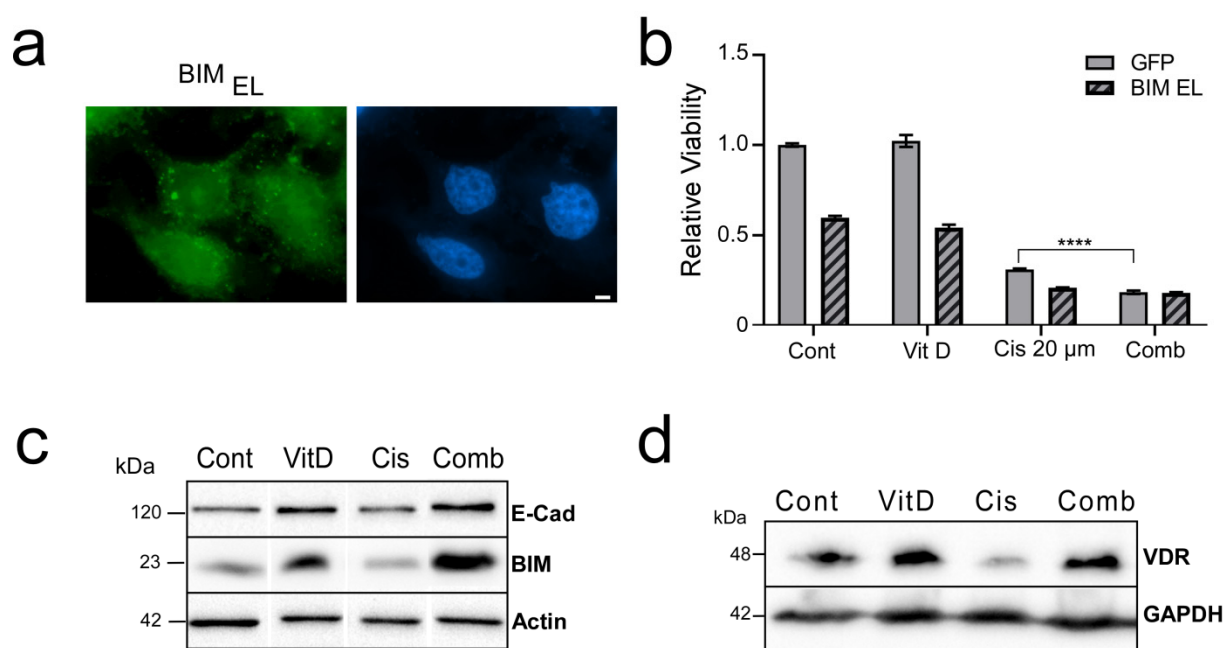

**Figure S10.** The VitD-BIM axis aids in overcoming cisplatin resistance in Fadu cells. (a) Fluorescence microscopy to visualize cytoplasmic BIM-GFP expression in Fadu cells. Cells were analyzed 16 h *post*-transfection. Scale bar, 10  $\mu$ m. (b) Ectopic BIM-GFP expression triggers apoptosis of FaDu cells. GFP was used as control. Cells were treated for 72 h (100  $\mu$ M VitD; 20 $\mu$ M cisplatin, and combination). Cell viability was normalized to untreated controls. (c)&(d) Immunoblot analysis of FaDu cells shows upregulation of E-Cadherin, and BIM (c), and VDR (d) in response to VitD/cisplatin. Actin and GAPDH served as the loading control. Proteins were detected by specific Ab.

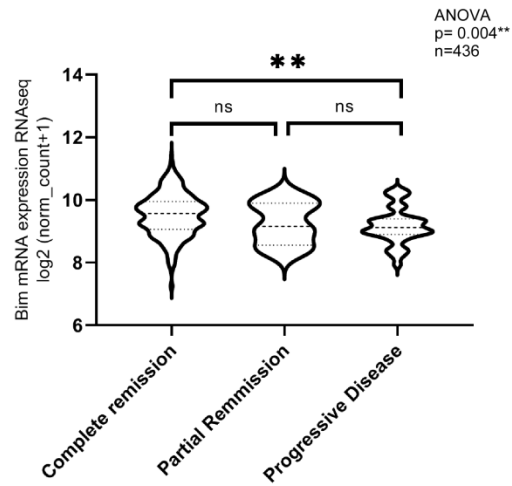

**Figure S11. High BIM expression significantly correlates with improved therapy success shown by primary therapy outcomes. P-values and sample size (n) are indicated.**
